# Supplementary material
Source: PubMed Central journal article supplement (PMC6588543)
Supplement: supp_7.2.E421_2018-0189-2-at.pdf [file supp_7.2.E421_2018-0189-2-at.pdf]

## Appendix 2 (as supplied by the authors): Influenza vaccine codes

### OHIP fee codes for influenza vaccines

| Fee code | Description                                  |
|----------|----------------------------------------------|
| G590     | INFLUENZA AGENT +VISIT                       |
| G591     | INJECTION OF INFLUENZA AGENT - SOLE REASON   |
| Q590     | BASIC FLU SHOT FEE-PER-VISIT PREMIUM FHN/FHO |

### ODB Drug Identification Numbers for influenza vaccines

| DIN      | Product Name         |
|----------|----------------------|
| 02015986 | FLUVIRAL S/F         |
| 02223929 | VAXIGRIP             |
| 02269562 | INFLUVAC             |
| 02346850 | AGRIFLU              |
| 02362384 | FLUAD                |
| 02365936 | FLUZONE              |
| 02420643 | FLUZONE QUADRIVALENT |
| 02420686 | FLUVIRAL             |
| 02420783 | FLULAVAL TETRA       |
| 02426544 | FLUMIST QUADRIVALENT |
| 02428881 | AGRIFLU              |
| 02432730 | FLUZONE QUADRIVALENT |
| 09857501 | FLUZONE              |
