# Supplementary material
Source: PubMed Central journal article supplement (PMC6588543)
Supplement: supp_7.2.E421_2018-0189-3-at.pdf [file supp_7.2.E421_2018-0189-3-at.pdf]

**Appendix 3 (as supplied by the authors): Characteristics by age group for those vaccinated in 2013-14 and 2015-16 influenza seasons**

| Characteristic                  | 2013/14 Influenza Season                 |                                        | 2015/16 Influenza Season                  |                                           |
|---------------------------------|------------------------------------------|----------------------------------------|-------------------------------------------|-------------------------------------------|
|                                 | Aged 65 years and under<br>(n=1,691,125) | Aged 66 years and older<br>(n=986,162) | Aged 65 years and under<br>(n= 1,450,594) | Aged 66 years and older<br>(n= 1,014,584) |
| <b>Demographics</b>             |                                          |                                        |                                           |                                           |
| Age at immunization, Mean ± SD  | 40.79 ± 19.66                            | 75.70 ± 7.18                           | 41.75 ± 19.45                             | 75.75 ± 7.22                              |
| Sex (female)                    | 930,477 (55.0%)                          | 538,810 (54.6%)                        | 802,609 (55.3%)                           | 552,524 (54.5%)                           |
| Rurality index of Ontario score |                                          |                                        |                                           |                                           |
| <i>Urban</i>                    | 1,301,194 (76.9%)                        | 683,515 (69.3%)                        | 1,112,857 (76.7%)                         | 699,169 (68.9%)                           |
| <i>Non-major Urban</i>          | 328,670 (19.4%)                          | 249,744 (25.3%)                        | 284,071 (19.6%)                           | 259,827 (25.6%)                           |
| <i>Rural</i>                    | 61,261 (3.6%)                            | 52,903 (5.4%)                          | 53,666 (3.7%)                             | 55,588 (5.5%)                             |
| Neighbourhood income quintile   |                                          |                                        |                                           |                                           |
| 1 ( <i>lowest</i> )             | 296,857 (17.6%)                          | 166,770 (16.9%)                        | 248,108 (17.1%)                           | 167,000 (16.5%)                           |
| 2                               | 315,852 (18.7%)                          | 198,228 (20.1%)                        | 269,020 (18.5%)                           | 200,106 (19.7%)                           |
| 3                               | 334,212 (19.8%)                          | 194,575 (19.7%)                        | 286,192 (19.7%)                           | 200,428 (19.8%)                           |
| 4                               | 364,927 (21.6%)                          | 207,293 (21.0%)                        | 321,345 (22.2%)                           | 217,828 (21.5%)                           |
| 5 ( <i>highest</i> )            | 379,277 (22.4%)                          | 219,296 (22.2%)                        | 325,929 (22.5%)                           | 229,222 (22.6%)                           |
| Low income senior               | *                                        | 143,962 (14.6%)                        | *                                         | 130,039 (12.8%)                           |
| Month of vaccination            |                                          |                                        |                                           |                                           |
| <i>October</i>                  | 580,502 (34.3%)                          | 535,314 (54.3%)                        | 345,226 (23.8%)                           | 391,882 (38.6%)                           |
| <i>November</i>                 | 656,532 (38.8%)                          | 349,836 (35.5%)                        | 764,756 (52.7%)                           | 497,182 (49.0%)                           |
| <i>December</i>                 | 183,716 (10.9%)                          | 59,735 (6.1%)                          | 245,626 (16.9%)                           | 97,026 (9.6%)                             |
| <i>January</i>                  | 243,012 (14.4%)                          | 36,989 (3.8%)                          | 70,636 (4.9%)                             | 22,551 (2.2%)                             |
| <i>February</i>                 | 22,315 (1.3%)                            | 3,567 (0.4%)                           | 18,673 (1.3%)                             | 4,761 (0.5%)                              |
| <i>March</i>                    | 5,048 (0.3%)                             | 721 (0.1%)                             | 5,677 (0.4%)                              | 1,182 (0.1%)                              |
| Immigration                     |                                          |                                        |                                           |                                           |
| <i>None</i>                     | 1,414,990 (83.7%)                        | 910,718 (92.3%)                        | 1,222,803 (84.3%)                         | 936,184 (92.3%)                           |
| <5 years                        | 51,763 (3.1%)                            | 6,282 (0.6%)                           | 20,304 (1.4%)                             | 3,486 (0.3%)                              |

|                                                                   |                 |                     |                 |                     |
|-------------------------------------------------------------------|-----------------|---------------------|-----------------|---------------------|
| 5-9 years                                                         | 57,760 (3.4%)   | 8,738 (0.9%)        | 47,309 (3.3%)   | 9,265 (0.9%)        |
| ≥10 years                                                         | 166,612 (9.9%)  | 60,424 (6.1%)       | 160,178 (11.0%) | 65,649 (6.5%)       |
| <b>Comorbidity</b>                                                |                 |                     |                 |                     |
| Diabetes                                                          | 223,165 (13.2%) | 318,933 (32.3%)     | 207,343 (14.3%) | 338,360 (33.3%)     |
| Hypertension                                                      | 430,205 (25.4%) | 751,558 (76.2%)     | 375,591 (25.9%) | 767,351 (75.6%)     |
| Chronic obstructive pulmonary disease                             | 36,282 (2.1%)   | 97,932 (9.9%)       | 33,676 (2.3%)   | 99,445 (9.8%)       |
| Asthma                                                            | 300,660 (17.8%) | 141,183 (14.3%)     | 261,388 (18.0%) | 149,317 (14.7%)     |
| Congestive heart failure                                          | 19,626 (1.2%)   | 96,505 (9.8%)       | 18,231 (1.3%)   | 98,292 (9.7%)       |
| Acute myocardial infarction                                       | 21,085 (1.2%)   | 56,569 (5.7%)       | 18,564 (1.3%)   | 57,329 (5.7%)       |
| Cancer                                                            | 58,636 (3.5%)   | 152,359 (15.4%)     | 60,459 (4.2%)   | 174,712 (17.2%)     |
| <b>Healthcare use in previous year</b>                            |                 |                     |                 |                     |
| Influenza vaccination in a physician office                       | 669,463 (39.6%) | 685,239 (69.5%)     | 498,191 (34.3%) | 602,817 (59.4%)     |
| Influenza vaccination in a community pharmacy                     | 121,232 (7.2%)  | 49,151 (5.0%)       | 363,445 (25.1%) | 230,413 (22.7%)     |
| Inpatient hospitalization                                         | 104,432 (6.2%)  | 113,567 (11.5%)     | 90,618 (6.2%)   | 114,687 (11.3%)     |
| Emergency Department visit                                        | 389,271 (23.0%) | 283,378 (28.7%)     | 337,174 (23.2%) | 295,414 (29.1%)     |
| Home care use                                                     | 52,006 (3.1%)   | 136,862 (13.9%)     | 46,425 (3.2%)   | 137,923 (13.6%)     |
| Number of physician office visits, Mean ± SD                      | 10.32 ± 13.62   | 17.26 ± 18.13       | 10.59 ± 14.21   | 16.84 ± 17.96       |
| Periodic health examination                                       | 115,303 (6.8%)  | 83,178 (8.4%)       | 76,408 (5.3%)   | 62,280 (6.1%)       |
| <b>Previous pharmacy use</b>                                      |                 |                     |                 |                     |
| Number of unique prescription medications in past year, Mean ± SD | *               | 10.13 ± 6.82        | *               | 10.03 ± 6.72        |
| Total cost of prescription medications in past year               | *               | 1,551.17 ± 3,434.90 | *               | 1,595.38 ± 3,846.95 |
| <\$500                                                            | *               | 344,173 (34.9%)     | *               | 378,679 (37.3%)     |
| \$500-\$999                                                       | *               | 210,593 (21.4%)     | *               | 213,007 (21.0%)     |
| \$1000-\$1999                                                     | *               | 216,877 (22.0%)     | *               | 207,189 (20.4%)     |
| \$2000-\$2999                                                     | *               | 100,111 (10.2%)     | *               | 98,592 (9.7%)       |
| \$3000-\$3999                                                     | *               | 47,498 (4.8%)       | *               | 45,791 (4.5%)       |
| >\$4000                                                           | *               | 66,910 (6.8%)       | *               | 71,326 (7.0%)       |
| Pharmacist service in past year                                   | 181,782 (10.7%) | 360,847 (36.6%)     | 166,757 (11.5%) | 364,358 (35.9%)     |
| Pharmacist service on day of vaccination                          | 7,625 (0.5%)    | 11,683 (1.2%)       | 7,673 (0.5%)    | 13,191 (1.3%)       |
